# Supplementary material for: Vitamin D Deficiency, Inflammation, and Diminished Endogenous Regenerative Capacity in Coronary Heart Disease
Source: PubMed Central journal article supplement — JACC Adv. 2024 Jan 4;3(2):100804. doi: 10.1016/j.jacadv.2023.100804 (PMC11198268; doi:10.1016/j.jacadv.2023.100804), 2024-01-04
Supplement: mmc1.pdf [file mmc1.pdf]

**Supplementary Table 1: Baseline characteristics and incident outcomes in the overall MIPS cohort and by vitamin D category.**

| <b>Baseline Characteristics</b>  | <b>All<br/>(n = 535)</b> | <b>Normal<br/>(&gt;30ng/mL)<br/>(n = 256)</b> | <b>Insufficiency<br/>(20-30ng/mL)<br/>(n = 163)</b> | <b>Deficiency<br/>(&lt;20ng/mL)<br/>(n = 116)</b> |
|----------------------------------|--------------------------|-----------------------------------------------|-----------------------------------------------------|---------------------------------------------------|
| Age (years)                      | 64.0 (9.0)               | 65.0 (8.0)                                    | 63.0 (8.0)                                          | 62.0 (9.0) <sup>A</sup>                           |
| Male                             | 415 (77.6%)              | 192 (75.0%)                                   | 138 (84.7%)                                         | 85 (73.3%) <sup>AB</sup>                          |
| Black Race                       | 134 (25.0%)              | 36 (14.1%)                                    | 41 (25.2%)                                          | 57 (49.1%) <sup>AB</sup>                          |
| BMI, kg/m <sup>2</sup>           | 29.7 (5.2)               | 28.8 (4.7)                                    | 30.4 (5.4)                                          | 30.7 (5.5) <sup>A</sup>                           |
| Current or Former Smoker         | 322 (60.2%)              | 151 (59.0%)                                   | 94 (57.7%)                                          | 77 (66.4%)                                        |
| History of Hypertension          | 394 (73.6%)              | 179 (69.9%)                                   | 126 (77.3%)                                         | 89 (76.7%)                                        |
| History of Hyperlipidemia        | 441 (82.4%)              | 215 (84.0%)                                   | 127 (77.9%)                                         | 99 (85.3%) <sup>A</sup>                           |
| History of Diabetes              | 167 (31.2%)              | 59 (23.0%)                                    | 56 (34.4%)                                          | 52 (44.8%) <sup>A</sup>                           |
| CHD                              | 348 (65.0%)              | 166 (64.8%)                                   | 109 (66.9%)                                         | 73 (62.9%)                                        |
| History of MI                    | 167 (31.2%)              | 75 (29.3%)                                    | 50 (30.7%)                                          | 42 (36.2%) <sup>A</sup>                           |
| History of Heart Failure         | 78 (14.6%)               | 27 (10.5%)                                    | 25 (15.3%)                                          | 26 (22.4%) <sup>A</sup>                           |
| History of CABG                  | 176 (32.9%)              | 84 (32.8%)                                    | 52 (31.9%)                                          | 40 (34.5%)                                        |
| eGFR, mL/min/1.73 m <sup>2</sup> | 81.7 (22.2)              | 81.2 (19.6)                                   | 83.4 (23.7)                                         | 80.2 (25.5) <sup>A</sup>                          |
| <b>Medications</b>               |                          |                                               |                                                     |                                                   |
| ACEi/ARB Use                     | 339 (63.4%)              | 109 (42.6%)                                   | 104 (63.8%)                                         | 81 (69.8%)                                        |
| Beta-blocker Use                 | 393 (73.5%)              | 45 (17.6%)                                    | 123 (75.5%)                                         | 94 (81.0%) <sup>A</sup>                           |
| Statin Use                       | 457 (85.4%)              | 176 (68.8%)                                   | 137 (84.0%)                                         | 100 (86.2%)                                       |
| Aspirin Use                      | 462 (86.4%)              | 220 (85.9%)                                   | 142 (87.1%)                                         | 101 (87.1%) <sup>A</sup>                          |
| Plavix Use                       | 162 (30.3%)              | 219 (85.5%)                                   | 40 (24.5%)                                          | 43 (37.1%) <sup>A</sup>                           |
| <b>Events</b>                    |                          |                                               |                                                     |                                                   |
| All-cause Death                  | 52 (9.7%)                | 17 (6.6%)                                     | 16 (9.8%)                                           | 19 (16.4%) <sup>A</sup>                           |
| Cardiovascular Death             | 28 (5.2%)                | 7 (2.7%)                                      | 10 (6.1%)                                           | 11 (9.5%) <sup>A</sup>                            |
| Myocardial Infarction            | 36 (6.7%)                | 12 (4.7%)                                     | 15 (9.2%)                                           | 9 (7.8%)                                          |

Continuous variables are presented as mean [SD], categorical variables as count (percentage). Letter superscripts denote significant differences ( $p < 0.05$ ) in column means/proportions between the vitamin D deficient group and either normal<sup>A</sup> or insufficient<sup>B</sup> groups.

**Supplementary Table 2: Relationship between VDD and adverse outcomes in the validation cohort.**

| <b>Outcome</b>              | <b>N</b> | <b>Model</b> | <b>HR [95% CI]</b>  | <b>P-value</b> |
|-----------------------------|----------|--------------|---------------------|----------------|
| <b>All-cause death</b>      | 535      | Unadjusted   | 2.64 [1.34 – 5.19]  | <b>0.005</b>   |
|                             |          | 1            | 2.97 [1.45 – 6.09]  | <b>0.003</b>   |
|                             |          | 2            | 3.54 [1.52 – 8.26]  | <b>0.003</b>   |
|                             |          | 3            | 3.41 [1.46 – 7.96]  | <b>0.005</b>   |
| <b>Cardiovascular death</b> | 534      | Unadjusted   | 2.91 [1.17 – 7.23]  | <b>0.022</b>   |
|                             |          | 1            | 2.71 [1.03 – 7.14]  | <b>0.044</b>   |
|                             |          | 2            | 5.17 [1.57 – 17.05] | <b>0.007</b>   |
|                             |          | 3            | 4.93 [1.46 – 16.61] | <b>0.010</b>   |

Cox models investigated the relationship between VDD and 5-year adverse outcomes in the MIPS validation cohort.

Model 1 was adjusted for age, sex, Black race, BMI, and current/former smoking history.

Model 2: Model 1 + hypertension, hyperlipidemia, diabetes, CHD, heart failure history, and eGFR.

Model 3: Model 2 + aspirin, ACEi/ARB, and statin use.

**Supplementary Table 3: Relationship between hsCRP and adverse outcomes.**

| <b>Outcome</b>         | <b>N</b> | <b>Model</b> | <b>HR/sHR [95% CI]</b> | <b>P-value</b>   |
|------------------------|----------|--------------|------------------------|------------------|
| <b>All-cause death</b> | 5,406    | Unadjusted   | 1.92 [1.69 – 2.19]     | <b>&lt;0.001</b> |
|                        |          | 1            | 2.16 [1.88 – 2.48]     | <b>&lt;0.001</b> |
|                        |          | 2            | 1.95 [1.68 – 2.28]     | <b>&lt;0.001</b> |
|                        |          | 3            | 1.91 [1.64 – 2.23]     | <b>&lt;0.001</b> |
| <b>CV death</b>        | 5,406    | Unadjusted   | 2.06 [1.71 – 2.49]     | <b>&lt;0.001</b> |
|                        |          | 1            | 2.17 [1.79 – 2.64]     | <b>&lt;0.001</b> |
|                        |          | 2            | 1.86 [1.54 – 2.26]     | <b>&lt;0.001</b> |
|                        |          | 3            | 1.85 [1.52 – 2.25]     | <b>&lt;0.001</b> |
| <b>MACE</b>            | 5,379    | Unadjusted   | 1.31 [1.15 – 1.48]     | <b>&lt;0.001</b> |
|                        |          | 1            | 1.38 [1.21 – 1.57]     | <b>&lt;0.001</b> |
|                        |          | 2            | 1.27 [1.11 – 1.44]     | <b>&lt;0.001</b> |
|                        |          | 3            | 1.28 [1.12 – 1.46]     | <b>&lt;0.001</b> |

Cox (all-cause death) and Fine-Gray models (cardiovascular death, MACE) investigated the relationship between hsCRP elevation above the median (>3mg/L) and adverse outcomes.

Covariates included in models are the same as defined in Supplementary Table 2.

**Supplementary Table 4: Relationship between hsCRP and adverse outcomes in the validation cohort.**

| <b>Outcome</b>              | <b>N</b> | <b>Model</b> | <b>HR [95% CI]</b> | <b>P-value</b> |
|-----------------------------|----------|--------------|--------------------|----------------|
| <b>All-cause death</b>      | 535      | Unadjusted   | 1.79 [0.90 – 3.56] | 0.096          |
|                             |          | 1            | 1.82 [0.89 – 3.72] | 0.10           |
|                             |          | 2            | 1.34 [0.62 – 2.91] | 0.45           |
|                             |          | 3            | 1.44 [0.66 – 3.11] | 0.36           |
| <b>Cardiovascular death</b> | 534      | Unadjusted   | 2.30 [0.87 – 6.05] | 0.092          |
|                             |          | 1            | 2.36 [0.86 – 6.46] | 0.095          |
|                             |          | 2            | 1.65 [0.58 – 4.69] | 0.34           |
|                             |          | 3            | 2.02 [0.70 – 5.82] | 0.19           |

Cox models investigated the relationship between hsCRP elevation above the median (>1.7mg/L) and adverse outcomes in the validation cohort.

Covariates included in models are the same as defined in previous tables.

**Supplementary Table 5: Relationship between VDD, inflammation, CPCs, and cardiovascular mortality in the validation cohort.**

| <b>Vitamin D and hsCRP status</b>       | <b>N</b> | <b>HR [95% CI]</b>  | <b>P-value</b> |
|-----------------------------------------|----------|---------------------|----------------|
| No VDD, <median hsCRP                   | 190      | Referent            | Referent       |
| VDD, >median                            | 40       | 7.91 [1.30 – 48.38] | <b>0.025</b>   |
| No VDD, >median                         | 170      | 2.23 [0.55 – 9.01]  | 0.26           |
| VDD, >median                            | 57       | 9.21 [1.73 – 49.02] | <b>0.009</b>   |
| <b>Vitamin D and CD34+ count status</b> | <b>N</b> | <b>HR [95% CI]</b>  | <b>P-value</b> |
| No VDD, >median CD34+ count             | 172      | Referent            | Referent       |
| VDD, >median                            | 42       | 3.29 [0.65 – 16.80] | 0.15           |
| No VDD, <median                         | 171      | 0.55 [0.14 – 2.10]  | 0.38           |
| VDD, <median                            | 54       | 4.27 [1.06 – 17.18] | <b>0.041</b>   |

Cox models investigated the relationship between VDD, hsCRP, CD34+ CPC count, and cardiovascular mortality. Models were adjusted for covariates in Model 2 in previous tables. The median hsCRP level (1.7mg/L) and CD34+ cell count (1.5956 cells/ $\mu$ L) were determined from the MIPS validation cohort.

**Figure Legends:**

**Supplementary Figure 1:** Sensitivity analysis of VDD and cardiovascular death for each subgroup in the EmCAB. Cox models investigated the relationship between VDD (25-hydroxyvitamin D<20 ng/mL) and cardiovascular mortality. Model was adjusted for covariates including age, sex, Black race, BMI, and current/former smoking history, hypertension, hyperlipidemia, diabetes, CHD, heart failure history, eGFR, aspirin use, ACEi/ARB use, and statin use. N=4,426.

**Supplementary Figure 2:** Cumulative incidence of outcomes including A) all-cause mortality, B) cardiovascular death, and C) MACE by hsCRP level either ≤3mg/L or >3mg/L. Incidence of all three outcomes was significantly higher ( $p<0.001$ ) in individuals with hsCRP>3mg/L than in those with levels ≤3mg/L. N=5,406 for all-cause mortality and cardiovascular mortality, N=5,379 for MACE.

**Supplementary Figure 3:** Cumulative incidence of outcomes including A) all-cause death, B) cardiovascular death, and C) MACE by CD34+ cell count relative to median (1.6924 cells/μL). Incidence of all-cause mortality and cardiovascular mortality were significantly higher in individuals with CD34+ cell counts beneath the median than in those with counts above the median. N=1,506 for all events.

**Supplementary Figure 1: Sensitivity analysis of VDD and cardiovascular death for each subgroup in the EmCAB.**

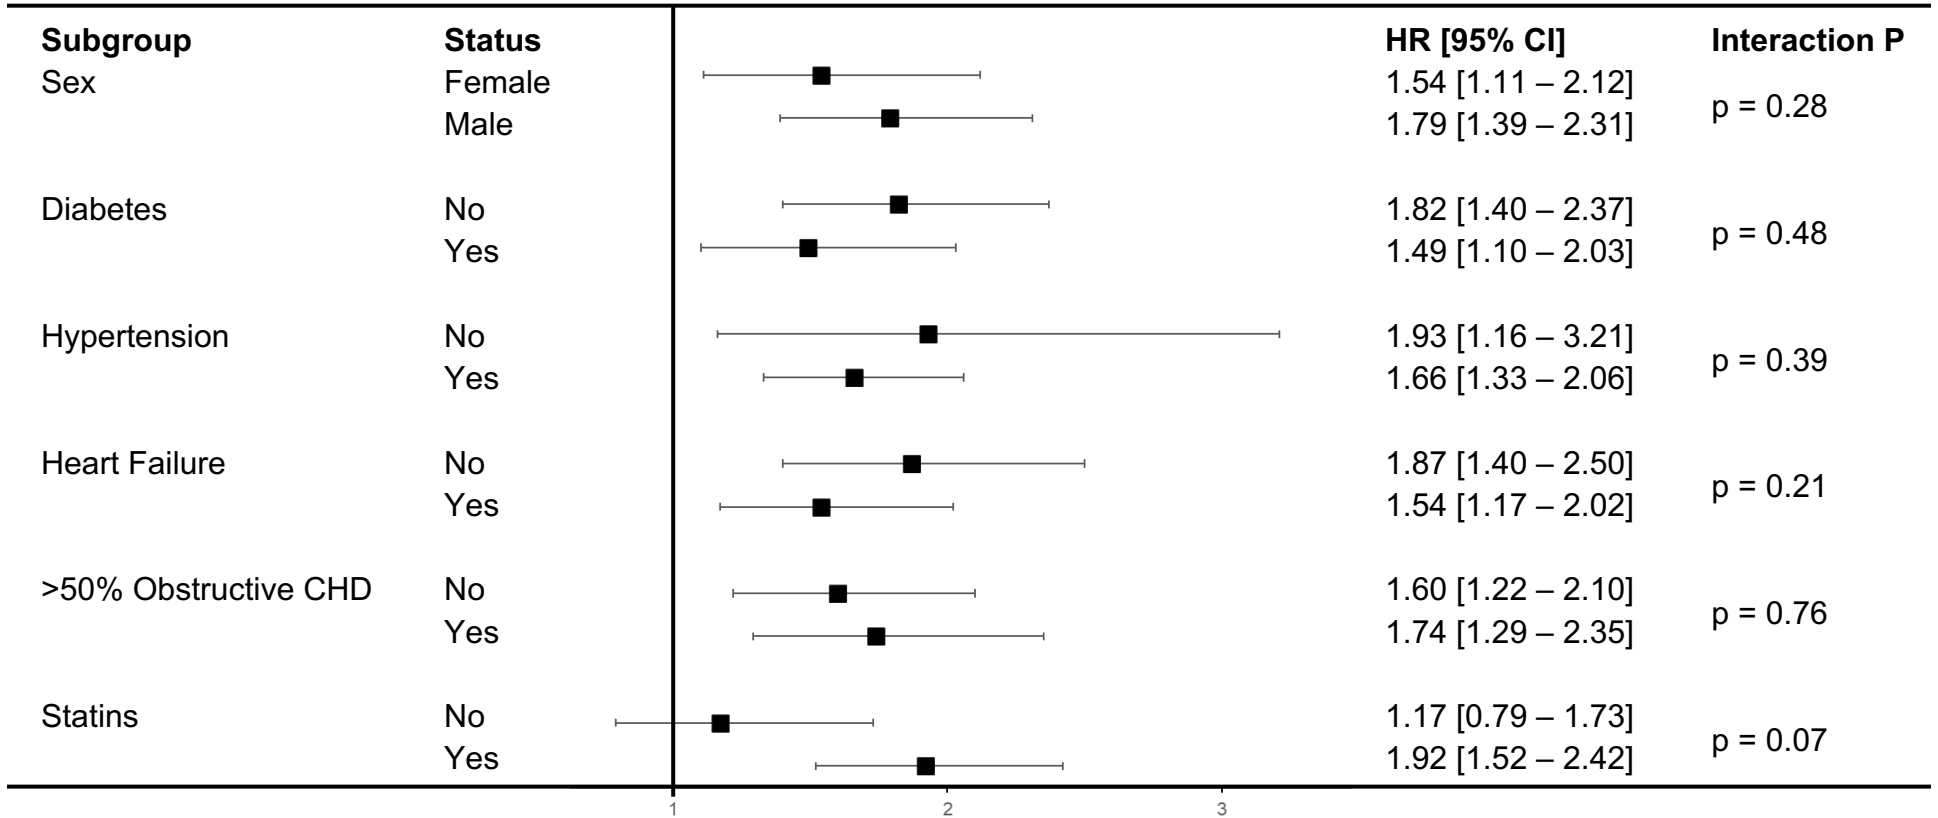

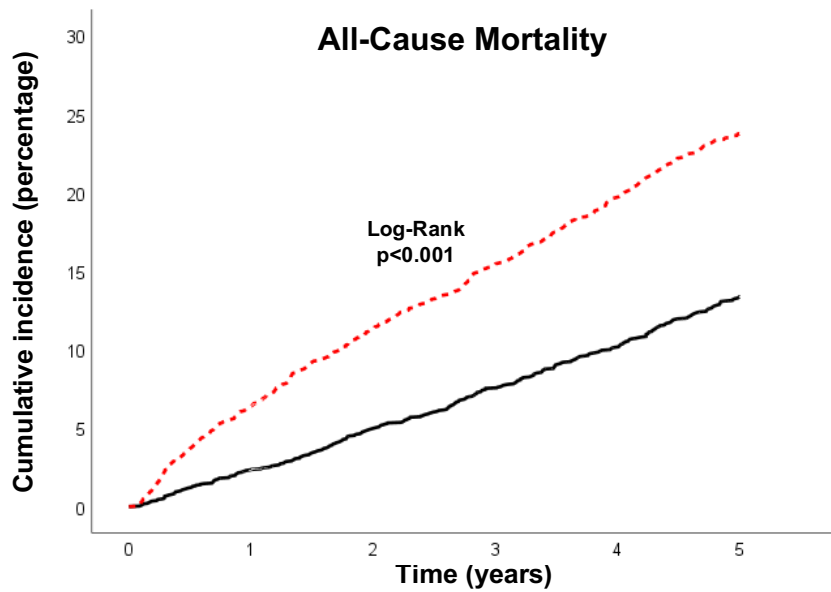

|      |      |      |      |      |      |
|------|------|------|------|------|------|
| 0    | 161  | 282  | 382  | 486  | 583  |
| 2530 | 2356 | 2162 | 2060 | 1942 | 1831 |
| 0    | 67   | 140  | 211  | 283  | 371  |
| 2876 | 2786 | 2631 | 2556 | 2469 | 2357 |

Events  
At-risk  
Events  
At-risk

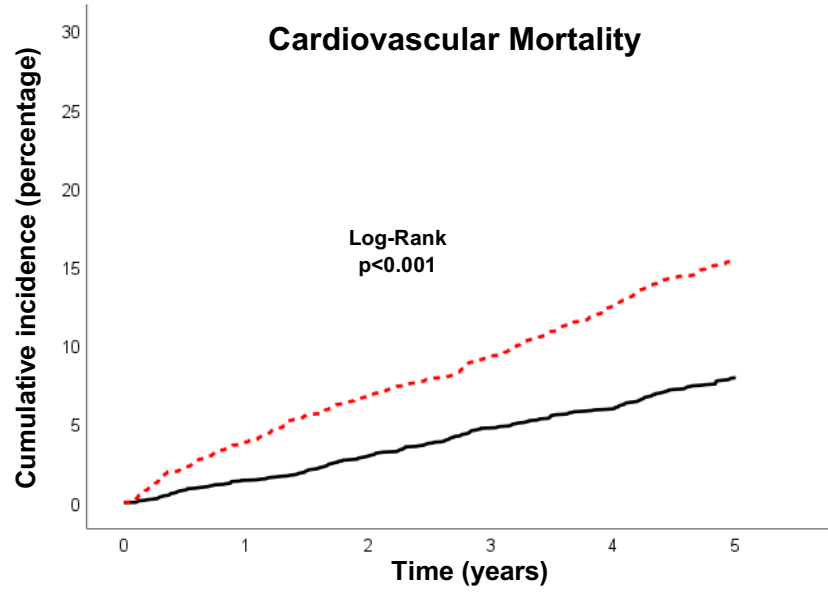

|      |      |      |      |      |      |
|------|------|------|------|------|------|
| 0    | 95   | 164  | 223  | 294  | 358  |
| 2530 | 2356 | 2162 | 2060 | 1942 | 1831 |
| 0    | 40   | 82   | 130  | 162  | 214  |
| 2876 | 2786 | 2631 | 2556 | 2469 | 2357 |

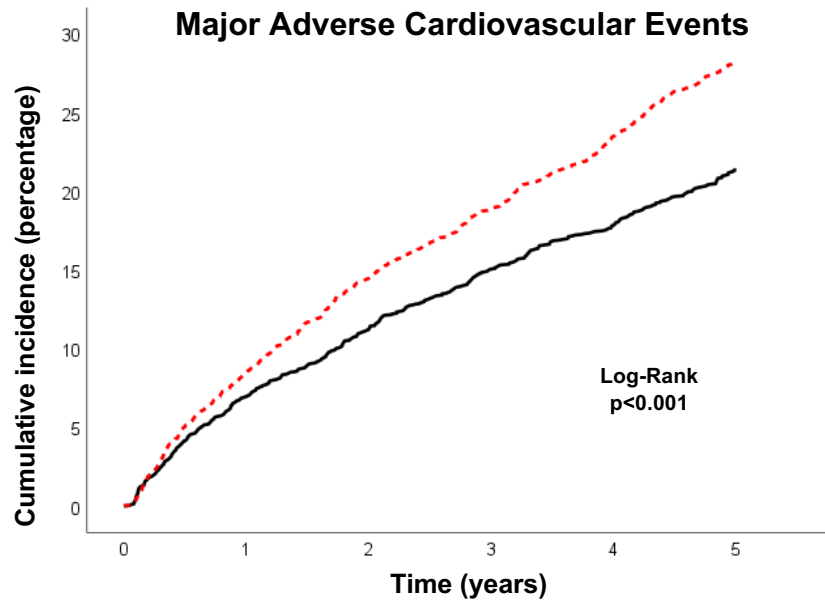

|      |      |      |      |      |      |
|------|------|------|------|------|------|
| 0    | 207  | 336  | 426  | 510  | 593  |
| 2519 | 2165 | 1787 | 1561 | 1370 | 1198 |
| 0    | 194  | 303  | 395  | 457  | 532  |
| 2860 | 2551 | 2183 | 1974 | 1791 | 1607 |

#### hsCRP status

- ≤3mg/L (n = 2,876 for mortality, n = 2,860 for MACE)
- - - >3mg/L (n = 2,530 for mortality, n = 2,519 for MACE)



### All-Cause Mortality

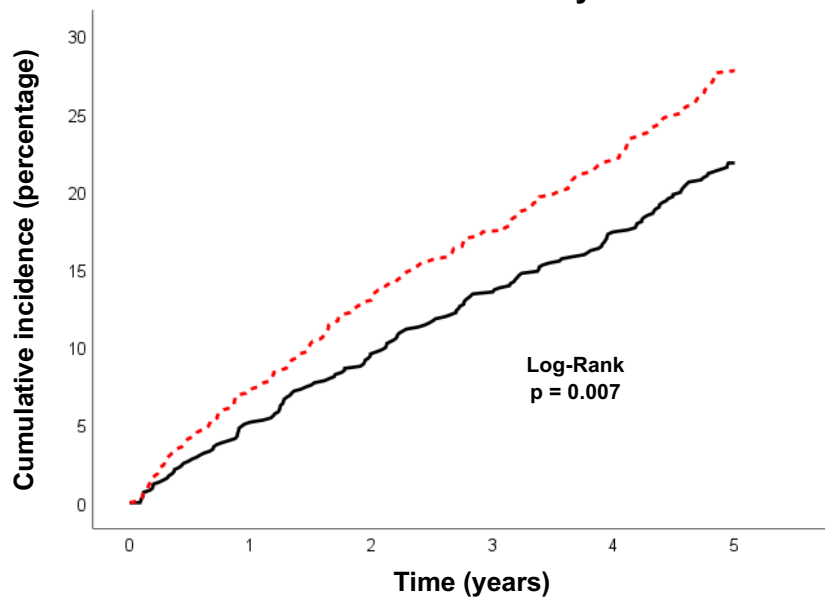

|     |     |     |     |     |     |
|-----|-----|-----|-----|-----|-----|
| 0   | 54  | 98  | 131 | 165 | 208 |
| 753 | 699 | 655 | 622 | 582 | 523 |
| 0   | 38  | 72  | 101 | 131 | 164 |
| 753 | 715 | 681 | 652 | 620 | 576 |

Events  
At-risk  
Events  
At-risk

### Cardiovascular Mortality

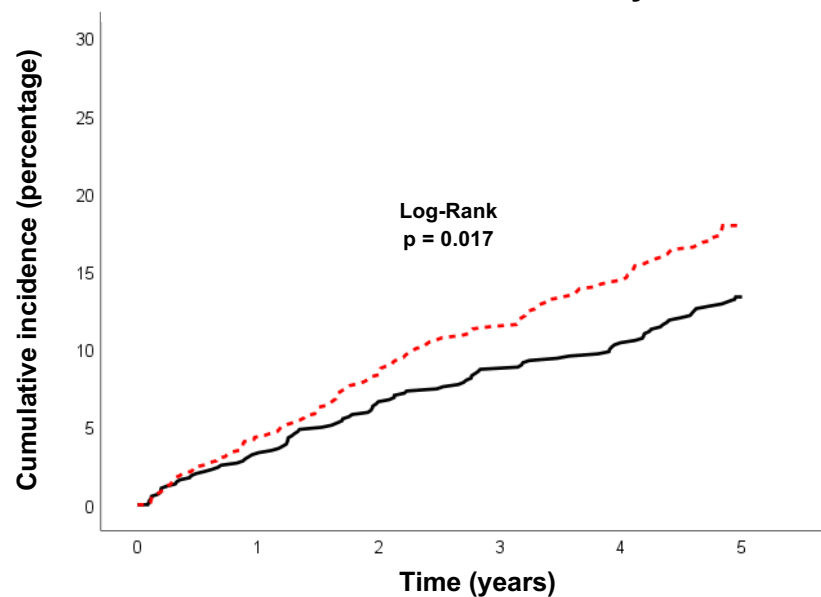

|     |     |     |     |     |     |
|-----|-----|-----|-----|-----|-----|
| 0   | 32  | 61  | 83  | 103 | 127 |
| 753 | 699 | 655 | 622 | 582 | 523 |
| 0   | 24  | 49  | 64  | 76  | 96  |
| 753 | 715 | 681 | 652 | 620 | 576 |

#### CD34+/CD45med cell count

- >median (n = 753)
- - - ≤median (n = 753)
